1 **Genetic diversity, population structure and selection signature in Ethiopian Sorghum**  
2 **(*Sorghum bicolor* L. [Moench]) germplasm**

3 Zeleke Wondimu<sup>\*</sup>, Hongxu Dong<sup>†</sup>, Andrew H. Paterson<sup>†</sup>, Walelign Worku<sup>‡</sup>, Kassahun Bantte<sup>\*.1</sup>

4 <sup>\*</sup>College of Agriculture and Veterinary Medicine, Jimma University, P.O. Box 307, Jimma,  
5 Ethiopia

6 <sup>†</sup>Plant Genome Mapping Laboratory, University of Georgia, Athens, Georgia 30602, USA

7 <sup>‡</sup>College of Agriculture, Hawassa University, PO Box 05, Hawassa, Ethiopia

- 8    **Running title:** Genetic diversity of Ethiopian sorghum
- 9    **Keywords:** Genetic diversity, population structure, selection signature, sorghum
- 10   <sup>1</sup>Corresponding author: Kassahun Bante, Department of Horticulture and Plant Sciences,
- 11   College of Agriculture and Veterinary Medicine, Jimma University, Ethiopia, Tel: +251-917-
- 12   832801, E-mail: [\*\*kassahunb@gmail.com\*\*](mailto:kassahunb@gmail.com)
- 13   Resubmitted submission to G3 Journal

14 **ABSTRACT**

15 Ethiopia, the probable center of origin and diversity for sorghum (*Sorghum bicolor* L. [Moench])  
16 and with unique eco-geographic features, possesses a large number of sorghum landraces that  
17 have not been well studied. Increased knowledge of this diverse germplasm through large-scale  
18 genomic characterization may contribute for understanding of evolutionary biology, and  
19 adequate use of these valuable resources from the center of origin. In this study, we characterized  
20 genetic diversity, population structure and selection signature in 304 sorghum accessions  
21 collected from diverse sorghum growing regions of Ethiopia using genotyping-by-sequencing  
22 (GBS). We identified a total of 108,107 high-quality single nucleotide polymorphism (SNPs)  
23 markers that were evenly distributed across the sorghum genome. The average gene diversity  
24 among accessions was high ( $H_e = 0.29$ ). We detected a relatively low frequency of rare alleles  
25 (26%), highlighting the potential of this germplasm for subsequent allele mining studies through  
26 genome wide association studies (GWAS). While we found no evidence of genetic  
27 differentiation among administrative regions ( $F_{ST} = 0.02$ ,  $p = 0.12$ ), population structure and  
28 cluster analyses showed clear differentiation among six Ethiopian sorghum populations ( $F_{ST} =$   
29  $0.28$ ,  $p = 0.01$ ) adapting to different environments. Analysis of SNP differentiation between the  
30 identified genetic groups revealed a total of 40 genomic regions carrying signatures of selection.  
31 These regions harbored candidate genes potentially involved in a variety of biological processes,  
32 including abiotic stress tolerance, pathogen defense and reproduction. Overall, a high level of  
33 untapped diversity for sorghum improvement remains available in Ethiopia, with patterns of  
34 diversity consistent with divergent selection on a range of adaptive characteristics.

35

36

37 **INTRODUCTION**

38 Sorghum (*Sorghum bicolor* L. [Moench]), native to the dry regions of northeast Africa (Dahlberg  
39 and Wasylikowa 1996), is a major food crop in the arid and semi-arid regions of the world  
40 (Balota *et al.* 2008). It is a highly diverse crop that has experienced multiple domestication  
41 processes, resulting in five major races differentiated by inflorescence type (Harlan and Dewet  
42 1972). Ethiopia, one of Vavilov's centers of origin for several crop species (Vavilov 1951), hosts  
43 wide genetic variability for sorghum; all races of sorghum and their corresponding intermediates  
44 are cultivated across the country's diverse agro-ecological zones and farming systems (Doggett  
45 1988; Teshome *et al.* 1997; Ayana and Bekele 1998).

46  
47 The wealth of genetic variability in the Ethiopian sorghum germplasm has already been noted  
48 worldwide as sources of desirable genes for sorghum improvement (Singh and Axtell 1973;  
49 Schertz 1977; Reddy *et al.* 2009). In addition, due to its unique eco-geographic features, Ethiopia  
50 possesses a large number of sorghum landraces in the gene bank as well as under subsistence  
51 agriculture. These landraces have evolved by the interaction between adaptation to a wide range  
52 of environments and selection imposed by farmers for traits enhancing agricultural productivity  
53 and performance, such as high yield, and resistance to biotic and abiotic stresses. Consequently,  
54 the genome of sorghum landraces might have experienced strong selection at genes controlling  
55 traits of agronomic and adaptive importance since domestication. Therefore, assessing genetic  
56 diversity, population structure, and selection signatures is meaningful from the perspectives of  
57 improving adequate use and conservation of these valuable resources, and may provide insights  
58 into evolutionary genomics.

59

60 Previously, genetic diversity of Ethiopian sorghum germplasm was studied using agro-  
61 morphological traits (Gebeyehu 1993; Teshome *et al.* 1997; Ayana and Bekele 1998; Ayana and  
62 Bekele 2000; Desmae *et al.* 2016b). However, this approach may not give reliable estimates of  
63 genetic diversity as these traits are limited in number and subjected to strong environmental  
64 influences (van Beuningen and Busch 1997). Genetic diversity analyses have also been carried  
65 out using various DNA marker techniques such as random amplified polymorphic DNA (RAPD)  
66 (Ayana *et al.* 2000), amplified fragment length polymorphisms (AFLPs) (Geleta *et al.* 2006),  
67 simple sequence repeats (SSRs) (Cuevas and Prom 2013; Adugna 2014; Desmae *et al.* 2016a;  
68 Weerasooriya *et al.* 2016), and Inter-simple sequence repeats (ISSRs) (Desmae 2007). While  
69 these studies generated useful information that is relevant to both plant breeding and germplasm  
70 conservation efforts, they were either focused on samples collected from a limited geographic  
71 range (Geleta *et al.* 2006; Desmae *et al.* 2016a), or involved limited numbers of markers (Ayana  
72 *et al.* 2000; Cuevas and Prom 2013; Adugna 2014; Weerasooriya *et al.* 2016) that are too small  
73 to fully reflect the breadth of genetic diversity that exist in the country. As a result, detailed  
74 information on genetic diversity and population structure of cultivated sorghum using reliable  
75 marker systems, while indispensable, is lacking in the center of origin, Ethiopia.

76  
77 Several studies on sorghum (Hamblin *et al.* 2004; Casa *et al.* 2005; Frere *et al.* 2011; Bouchet *et*  
78 *al.* 2012; Mace *et al.* 2013; Morris *et al.* 2013; Zhang *et al.* 2015; Campbell *et al.* 2016; Cuevas  
79 *et al.* 2017; Tao *et al.* 2017) have utilized selective sweep analysis to detect genomic regions and  
80 genes affected by natural and artificial selection. However, most of these studies had certain  
81 limitations, either they were based on limited genome coverage (Hamblin *et al.* 2004; Casa *et al.*  
82 2005; Frere *et al.* 2011; Bouchet *et al.* 2012) or used sorghum germplasm that have gone

83 through the sorghum conversion program (Morris *et al.* 2013; Zhang *et al.* 2015; Cuevas *et al.*  
84 2017). Nevertheless, these converted sorghum lines (i.e., short, early maturity and photoperiod  
85 insensitive) that are adapted to temperate regions represent partial of the genetic diversity in  
86 breeding programs, the diversity underlying traits of economic and adaptive importance remains  
87 trapped within the tropical germplasm (Cuevas and Prom 2020). Thus, characterization of the  
88 Ethiopian germplasm at genome wide scale based on patterns of nucleotide variation and  
89 selection signature will improve conservation efforts and its utilization in research and breeding  
90 programs.

91  
92 Next-generation sequencing technologies have made important contributions to the development  
93 of new genotyping platforms. Genotyping-by-sequencing (GBS) is increasingly being used for  
94 profiling genome-wide nucleotide variation in many species (Elshire *et al.* 2011). The inherent  
95 characteristics of GBS including genome-wide molecular marker discovery, highly multiplexed  
96 genotyping, flexibility and low cost make it an excellent tool in genomic analysis of diverse  
97 populations, including genome-wide association studies and genomic signatures of selection  
98 (Deschamps *et al.* 2012; Poland and Rife 2012; Morris *et al.* 2013).

99  
100 In this study, we used a high throughput GBS approach to generate whole genome profiles and  
101 high-quality SNP markers in a collection of 304 sorghum accessions. The objectives of this study  
102 were to (a) assess the extent and patterns of genetic diversity among sorghum accessions  
103 collected from major sorghum growing regions of Ethiopia, (b) determine the population  
104 structure of the accessions, and explore their potential for future genome wide association studies  
105 , and (c) identify genomic regions and genes potentially subjected to selection.

## 106 **MATERIALS AND METHODS**

### 107 **Plant materials**

108 A total of 304 sorghum accessions used in this study were collected from farmers' fields of  
109 major sorghum growing administrative regions of Ethiopia (see File S1). Accessions from  
110 regions with sample size less than ten were included in adjacent regions to reduce bias due to  
111 small sample size. In doing so, six, two and two accessions from Gambella, Afar and Somalia  
112 regions were, respectively, placed under the Southern Nations, Amhara and Oromia regions. This  
113 reduced the seven regions from which the accessions were originally collected to four major  
114 sorghum producing regions (Amhara, Oromia, Tigray and South Nations). These regions include  
115 a broad swath of the range of sorghum cultivation that account for 94% of the total sorghum  
116 production in the country (Central Statistical Agency 2018). During collection readings of the  
117 coordinates and altitudes of the collection sites were recorded by a GPS map 60CSx Global  
118 Positioning System (GPS) (Garmin), which were overlaid on to the maps of Ethiopia (Figure 1).

### 119 **DNA extraction and genotyping-by-sequencing (GBS)**

120 Prior to DNA extraction, the accessions were grown under field conditions and subjected to one  
121 cycle of controlled self-fertilization for purification. Leaf samples from a single representative  
122 plant per accession were collected from 15-day-old plants grown in small pots in a greenhouse.  
123 DNA was then extracted from lyophilized leaf tissues following a modified cetyltrimethyl  
124 ammonium bromide (CTAB) protocol (Mace *et al.* 2003). A total of four 96-plex GBS libraries  
125 were constructed and genotyped at the University of Georgia, Genomics and Bioinformatics  
126 Core Facility. The genotyping by sequencing (GBS) procedure (Elshire *et al.* 2011) was  
127 implemented using the *ApeKI* enzyme system. In brief, each DNA sample was digested with  
128 *ApeKI* (recognition site: G|CWCG; New England Biolabs Inc., Ipswich, MA, USA), then ligated

129 to a unique barcoded adapter. For each library, 96 samples were pooled, and fragments with  
130 200–500 base pair (bp) in length were extracted from a 2% agarose gel after electrophoresis and  
131 purified using a Qiagen Gel Extraction Kit (Qiagen, Hilden, Germany). The purified DNA was  
132 PCR amplified using GoTaq Colorless Master Mix (Promega, Madison, WI, USA), and the PCR  
133 product was extracted as above to eliminate primer–dimers. All libraries were sequenced on a  
134 NextSeq platform (Illumina, San Diego, CA, USA) with 150 bp single-end reads.

### 135 **Single nucleotide polymorphism (SNP) calling and quality control**

136 SNP calling was performed using the TASSEL GBS pipeline (Bradbury *et al.* 2007) with the  
137 following parameters: kmer length of 100 bp, minimum quality score of 10, minimum call rate of  
138 0.5, and minor allele frequency (MAF) of 0.01. Physical positions of generated SNPs were  
139 obtained based on alignment to the *Sorghum bicolor* reference genome v1.4 (Paterson *et al.*  
140 2009). Missing data were imputed with Beagle V4.0 (Browning and Browning 2007).

### 141 **Analysis of population structure**

142 Two approaches were used to describe the population structure of the Ethiopian sorghum  
143 collection. First, hierarchical population structure was assessed with a model-based estimation of  
144 admixed ancestry using the ADMIXTURE program (Alexander *et al.* 2009). To determine the  
145 optimal number of sub-populations (K), ADMIXTURE was run with a five-fold cross-validation  
146 (CV) procedure for K ranging from 1 to 20, and the K value with the lowest CV error was  
147 selected (Alexander *et al.* 2009). Second, pairwise genetic distances among individuals were  
148 calculated using the Sokal and Michener dissimilarity index (Sokal and Michener 1958). The  
149 resulting distance matrix was then subjected to a clustering analysis using a Neighbor-Joining  
150 (NJ) tree with 1000 bootstraps as implemented in DARwin 6.0.14 (Perrier and Jacquemoud-  
151 Collet 2006). To further investigate the spatial pattern of genetic diversity, R package tess3r was



152 used to perform the spatial interpolation of ancestry coefficients structure onto the Ethiopian  
153 geographical map (Caye *et al.* 2016). Ancestry coefficients ( $q$ ) estimated with ADMIXTURE  
154 program using the optimum number of subpopulations ( $K=6$ ) suggested by cross-validation (CV)  
155 procedure (Alexander *et al.* 2009) were used to explore genome relatedness among 304 sorghum  
156 accessions to the stated locations of origin in Ethiopia.

### 157 **Genetic diversity and population differentiation**

158 For each SNP, the number and frequency of alleles was calculated using TASSEL 5.0 (Bradbury  
159 *et al.* 2007). To determine the extent of genetic diversity among individuals of the entire panel,  
160 effective number of alleles ( $N_E$ ), observed heterozygosity ( $H_o$ ), gene diversity ( $H_e$ , i.e., expected  
161 heterozygosity) and polymorphism information content (PIC) were estimated using the allele  
162 frequencies of each SNP. The above genetic diversity estimates were also computed for pooled  
163 accessions within each administrative region and ADMIXTURE inferred subpopulation.  
164 However, a comparison of diversity estimates in big populations compared that in small  
165 populations could be largely biased by the different sample sizes. To account for differences in  
166 population size, we used a subsampling scheme by taking into account the required level of  
167 precision ( $\alpha = 0.05$ ), the variances and average differences in allele frequencies between  
168 populations (Miaoulis and Michener 1976). This procedure indicated that a subsample size of 25  
169 and 30 accessions randomly selected from each ADMIXTURE and regional population,  
170 respectively, would be appropriate to obtain unbiased estimates of the above genetic parameters  
171 (i.e.,  $N_E$ ,  $H_o$ ,  $H_e$  and PIC) for each population. In addition, allelic richness ( $R_s$ ) and number of  
172 private alleles for each population were computed with the rarefaction method, that adjusts for  
173 differences in sample sizes across populations (Hulbert 1971), using the PopGenReport package  
174 in R (Gruber and Adamack 2014).

175 To estimate the components of variance among and within populations, analysis of molecular  
176 variance (AMOVA) was performed as described in Excoffier *et al.* (1992) using the R package  
177 Hierfstat (Goudet 2005). To investigate population differentiation, pairwise fixation index ( $F_{ST}$ )  
178 among populations was estimated based on the method of Weir and Cockerham (Weir and  
179 Cockerham 1984) using the same package. Gene flow among populations was also estimated  
180 using indirect method based on the number of migrants per generation ( $N_m$ ) as  $(1-F_{ST})/4F_{ST}$  as  
181 described by Wright (1965).

### 182 **Detection of $F_{ST}$ outliers**

183 To detect signatures of selection among ADMIXTURE subpopulations,  $F_{ST}$  outliers were  
184 detected based on SNPs with MAF > 5% using BayeScan 2.1 (Foll and Gaggiotti 2008). To  
185 reduce the identification of false positives, a 50,000-iteration burn-in period and thinning interval  
186 size of 10 were used. The prior odd threshold to identify  $F_{ST}$  outlier SNPs was determined using  
187 a false discovery rate (FDR) of 0.05 as implemented in the “plot\_bayescan” function in R. Genes  
188 found within 100 kb of the genomic regions detected in the above test were also searched using  
189 the most recently annotated version of the sorghum genome v3.1 ([www.phytozome.net](http://www.phytozome.net)). The  
190 distance 100 kb was based on the average genome-wide linkage disequilibrium (LD) decay of  
191 100 kb (data not shown).

### 192 **Data availability**

193 File S1 contains detailed descriptions of Ethiopian sorghum accessions, their regions of origin  
194 and geographic information. File S2 contains SNP ID numbers, locations and SNP genotypes for  
195 all accessions and SNPs. File S3 contains co-ancestry coefficient matrix of 304 Ethiopian  
196 sorghum accessions based on ADMIXTURE analysis at  $K = 6$ . File S4 contains detailed  
197 description of  $F_{ST}$  outlier SNPs and candidate genes located in the vicinity of these SNPs based

198 on BAYESCAN results for outlier prediction. Figure S1 contains genomic distribution of  
199 108,107 high quality SNPs across the 10 sorghum chromosomes, and their corresponding  
200 density. Table S1 contains AMOVA and  $F_{ST}$  test results for accessions by  
201 geographic/administrative region and ADMIXTURE subgroup analyses. All supplemental  
202 materials are available at Figshare.

## 203 **RESULTS**

### 204 **SNP discovery**

205 A total of 350,618,420 reads were generated after sequencing of GBS libraries from 304  
206 sorghum accessions. After de-duplication and alignment of unique sequence tags to the reference  
207 sorghum genome v1.4 (Paterson *et al.* 2009), a total of 236,000 SNPs were called using the GBS  
208 pipeline in TASSEL 5 (Bradbury *et al.* 2007). The quality control of SNP data (see Materials and  
209 Methods for criteria) produced a total of 115,501 high-quality SNPs (see File S2). Overall,  
210 32.81% SNP calls were missing and imputed using Beagle V4.0 (Browning and Browning  
211 2007). We further retained SNPs with  $MAF > 0.01$  for downstream analysis.

212  
213 A genome-wide SNP density plot (see Figure S1) revealed that the highest number of these SNPs  
214 were physically mapped on chromosome 2 (12.09%, 13,075 SNPs). The highest and lowest  
215 marker densities were observed on chromosome 7 (7.41 kb) and chromosome 5 (5.31 kb),  
216 respectively, with an average marker density of 6.13 kb per chromosome. The identified SNPs  
217 were also categorized according to nucleotide substitutions as either transitions ( $A \leftrightarrow G$  or  $C \leftrightarrow T$ )  
218 or transversions ( $A \leftrightarrow C$ ,  $C \leftrightarrow G$ ,  $A \leftrightarrow T$ ,  $G \leftrightarrow T$ ). Our analysis of transitions (Ts) and transversions  
219 (Tv) SNPs showed a Ts/Tv ratio of 1.7:1 (i.e., 68,097/40,010; Table 1), which is very close to the  
220 expected 2:1 ratio of neutral variants (Siol *et al.* 2010). The observed transition bias could be

221 caused by a mutational bias due to intrinsic properties of DNA (e.g. cytosine deamination) in  
222 plant genomes (Gaut *et al.* 2011). Although this result suggest that most of the single nucleotide  
223 mutations observed in this study are nearly neutral, we expect that some SNPs are likely to be  
224 under selection, and thus may not susceptible to mutation bias.

## 225 **Population structure**

226 ADMIXTURE analysis using a five-fold cross-validation (CV) for  $K= 1$  to  $K = 20$  indicated a  
227 steep decrease in CV error values until  $K = 6$  (Figure 2A). For example, CV error at  $K = 1$  was  
228 0.57937, at  $K = 6$  was 0.41739, at  $K = 8$  was 0.41433, at  $K = 9$  was 0.41027, indicating that there  
229 is no steep decrease in CV error values after  $K = 6$ . Given the modest population size in this  
230 study, we chose  $K = 6$  as an optimal number of subpopulations, referred to as subgroups, SG-I to  
231 SG-VI (Figure 2B). Although comparing the two methods showed that there were few accessions  
232 that clustered differently depending on the analysis method, overall the clustering pattern  
233 generated using a Neighbor-Joining tree (Figure 3A), also supported the possibility that the  
234 Ethiopian sorghum collection evaluated in this study has six ( $K = 6$ ) well-differentiated genetic  
235 groups and some admixtures. Therefore based on ADMIXTURE analysis, we assigned 234  
236 (77%) accessions to one of the six subgroups with an ancestry membership coefficient  
237 probability of greater than 0.60 ( $q > 0.60$ ), whereas the remaining 23% showed evidence of  
238 mixed population ancestry (see File S3).

239  
240 According to Amede *et al.* (2015) eight agro-ecological zones (cool/humid, cool/subhumid,  
241 cool/semiarid, cool/arid, warm/humid, warm/subhumid, warm/semiarid and warm/arid) have  
242 been identified in Ethiopia based on the Global 16 Class Classification System. Given the fact  
243 that sorghum is grown in all these agro-ecologies except warm/humid and cool/arid (Menamo *et*  
244 *al.* 2020), we hypothesized that genetic groups could reflect to population structure across the

245 agro-ecological zones of Ethiopia. Consistent with this hypothesis, we observed strong  
246 geographic clustering when the accessions were mapped by group (Figure 3B), suggesting  
247 significant contribution of agro-ecological variation to ancestry, with individuals in specific  
248 subgroup found to co-locate in geographic regions. For instance, in SG-I (blue), the majority of  
249 the individuals were from eastern parts of Ethiopia (Figure 3B). In addition, individuals with  
250 high membership coefficients in SG-III (green), SG-V (purple) and SG-VI (yellow) showed  
251 strong clustering according to their geographic origin (central, western and northern parts of the  
252 country, respectively). In contrast, SG-II which includes 41 accessions showed modest clustering  
253 according to geography, suggesting that the population structure could also be affected by other  
254 factors such as seed exchange and food preferences (Deu *et al.* 2010).

#### 255 **Genetic diversity and population differentiation**

256 Based on the allele frequency distribution of this collection, 26% of the SNPs were rare (MAF <  
257 0.05) (Figure 4). For the four regional populations, we found a similar proportion of rare alleles,  
258 with values ranging from 15% to 20% in accessions collected from the Amhara and Tigray  
259 regions, respectively. Among the six ADMIXTURE subgroups, SG-III had the highest  
260 percentage (46%) of rare alleles, while in the remaining groups (SG-I, SG-II, IV, V and VI), an  
261 average of 24% of the detected alleles were rare. The distribution of these rare alleles among  
262 populations could represent a recent admixture as a result of inter-population gene flow (Memon  
263 *et al.* 2016). The correlation of a recent admixture and the distribution of rare alleles among  
264 populations, may in part explained by the fact that some alleles would have the opportunity to be  
265 reintroduced to the populations through recent introgression, and that these alleles will come to  
266 be spread fairly evenly in the populations in very small quantities. In addition, pairwise  
267 population comparisons showed that 76% to 91% of the SNPs common in at least one population

268 were common among all regional populations (i.e., 58,673 SNPs), whereas only 18% to 41% of  
269 such SNPs were common among all ADMIXTURE subgroups (i.e., 12,400 SNPs).

270

271 Genetic diversity parameters for the entire panel, regional populations and ADMIXTURE  
272 subgroups are summarized in Table 2. The individual SNP PIC values of the entire panel ranged  
273 between 0.09 and 0.37, with an average value of 0.24 across all polymorphic loci (Table 2).  
274 Gene diversity ( $H_e$ ; i.e. expected heterozygosity) ranged from 0.09 to 0.50, and its value average  
275 all loci was 0.29 (Table 2). The mean observed heterozygosity value ( $H_o = 0.12$ ) of the entire  
276 panel was similar with that observed in previous studies of sorghum landraces (Dje *et al.* 2004;  
277 Cuevas *et al.* 2017). Among the four regions, the highest level of genetic diversity was observed  
278 in accessions collected from the Tigray region ( $N_E = 1.53$ ,  $H_e = 0.32$ ,  $PIC = 0.26$ ), and the lowest  
279 in the Oromia region ( $N_E = 1.42$ ,  $H_e = 0.28$ ,  $PIC = 0.24$ ). Allelic richness based on rarefaction  
280 was relatively higher in the Southern Nations ( $R_S = 1.81$ ) and lower in the Oromia region ( $R_S =$   
281  $1.77$ ) (Table 2). Considering the genetic diversity among the six ADMIXTURE subgroups, the  
282 highest level of genetic diversity ( $N_E = 1.52$ ,  $R_S = 1.77$ ,  $H_e = 0.32$ ) was found in SG-V (Table 2).  
283 SG-VI had the second highest level of diversity ( $R_S = 1.66$ ,  $H_e = 0.31$ ) and harbored many  
284 private alleles ( $N_{PA} = 1,430$ ) compared to other subgroups (Table 2).

285

286 Analysis of molecular variance (AMOVA) showed that 98% of the total variation was found  
287 within regions, while 28.06% and 71.94% of the total variation was found among and within  
288 ADMIXTURE subgroups, respectively (see Table S1). The number of migrants per generation as  
289 indirect estimate of gene flow was also very high ( $N_m = 12.25$ ) among the regions, leading to a  
290 low genetic differentiation between the regions. The pairwise fixation index ( $F_{ST}$ ) among

291 ADMIXTURE subgroups ranged from 0.11 to 0.48, indicating a relatively high level of genetic  
292 differentiation (Table 3) that resulted from a restricted gene flow ( $N_m = 0.64$ ) among the  
293 populations.

#### 294 **Genomic signatures of selection**

295 The identification of functional genomic regions that might be targets of selection provides  
296 information useful for the discovery of candidate genes of breeding importance in sorghum  
297 (Campbell *et al.* 2016). In this study, a total of 79,754 SNPs ( $MAF > 0.05$ ) were tested for  
298 evidence of selection among the six ADMIXTURE subgroups using BayeScan v.2.1 (Foll and  
299 Gaggiotti 2008). This approach distinguishes between loci that diverged via random drift and  
300 those that diverged via selection. Among the 79,754 SNPs analyzed, 40 ( $FDR < 0.05$ ) present  
301 evidence of selection among the six genetic groups according with BAYESCAN results (Figure  
302 5; see File S4). Among these 40  $F_{ST}$  outlier SNPs, 38 were consistent with the evidence of  
303 diversifying selection ( $\alpha > 0$ ) and two corresponded to balancing selection ( $\alpha < 0$ ).

304  
305 We also identified a total of 47 candidate genes in the vicinity of the genomic regions containing  
306 these  $F_{ST}$  outlier SNPs (see File S4). These candidate genes represented different categories of  
307 biological processes, including regulation of biotic and abiotic stress tolerance (F-box proteins,  
308 MADS box transcription factor), signal transduction (similar to low temperature-responsive  
309 RNA-binding protein), plant cell wall synthesis (Glycosyl transferase 1) and ion transport.

#### 310 **DISCUSSION**

311 Ethiopia, the probable center of origin and diversity for sorghum and with unique eco-geographic  
312 features, possesses a large number of landraces in the gene bank as well as under subsistence  
313 agriculture. The germplasm from this region represents one of the most important sources of

314 useful genes for sorghum improvement efforts around the world (Dogget 1988; Reddy *et al.*  
315 2009; Adugna 2014). In addition to providing a broad sample of the diversity in sorghum, the  
316 genotypes included in this study are known to display agronomically important traits including  
317 drought tolerance (Wondimu *et al.* 2020). Therefore, the genomic characterization presented  
318 herein provides an advantageous starting point to make adequate use of these valuable resources,  
319 and could also be employed for the genomic dissection of important phenotypes in sorghum.

### 320 **Genetic diversity and regional differentiation**

321 In this study, a high-throughput GBS technology was used to explore genetic diversity,  
322 population structure, and selection signature in sorghum accessions collected across the center of  
323 origin and domestication, Ethiopia. Indeed, the lower frequency of rare alleles (Figure 4)  
324 observed in our study than in a previous GBS analysis of Ethiopian sorghum landraces (Girma *et*  
325 *al.* 2019), highlights the potential of this collection for subsequent allele mining studies through  
326 GWAS. The level of diversity in this Ethiopian collection is higher than that observed in the  
327 global sorghum association panel (Maina *et al.* 2018), which confirms Doggett's long standing  
328 hypothesis that Ethiopia is not only part of the center of origin but also the center of diversity of  
329 sorghum (Doggett 1988). The diverse agro-ecological zones and farming systems where  
330 sorghum is grown in Ethiopia as well as the high level of gene flow between cultivated sorghum  
331 and its wild relatives, all seem to have contributed to the wide range of variation observed in this  
332 and previous studies (Snowden 1936; Stemler *et al.* 1977; Teshome *et al.* 1997; Ayana and  
333 Bekele 1998, 1999; Tesso *et al.* 2008) of Ethiopian sorghum germplasm. An intriguing  
334 hypothesis is that the richness of diversity in Ethiopia may facilitate selection for different allele  
335 combinations that result in particular suites of traits, providing rich genetic sources for sorghum  
336 improvement programs.



337 Our results (see Table S1) support previous reports of low level of regional differentiation for  
338 cultivated sorghum in Ethiopia (Ayana and Bekele 1998; Ayana *et al.* 2000; Desmae *et al.*  
339 2016a; Desmae *et al.* 2016b). The lack of regional differentiation could be attributed, at least in  
340 part, to frequent gene flow as a consequence of extensive exchange of materials between farmers  
341 from these regions, which was also confirmed by the high rate of gene flow observed among the  
342 regions. An alternative or perhaps complementary explanation for the lack of regional  
343 differentiation is that these regions do not represent different agro-environmental conditions but  
344 political regions formed based on the federal system of Ethiopia. Overall, these results suggest  
345 that a single large random collection from the whole area would be adequate to capture and  
346 preserve most of the genetic variation present in Ethiopian sorghum germplasm. However, the  
347 high level of allelic diversity in population from the Southern Nations (Table 2) could be an  
348 indicator of the conservation status of its genetic diversity, thus additional collection from this  
349 region may be needed to support and increase the genetic diversity of Ethiopian sorghum  
350 germplasm collection.

### 351 **The structure of genomic diversity in Ethiopian sorghum**

352 While regional differentiation is lacking, analysis of genotypic data revealed clear differentiation  
353 among six Ethiopian populations (Figures 2 and 3). Previous studies have shown that sorghum  
354 populations are structured according to botanical races and geography (Barnaud *et al.* 2007; Deu  
355 *et al.* 2010; Maina *et al.* 2018). Since the accessions used in the current study were not  
356 characterized for racial groups, it was not possible to relate the observed genetic structure with  
357 racial category. Of the different sorghum growing agro-ecological regions in Ethiopia, the wetter  
358 regions mostly represent the western parts of the country which receive high rainfall, and with  
359 rainfall rapidly decreasing to the east (Amede *et al.* 2015). Our spatial analysis (Figure 3B)

360 separates populations in the SG-V (purple; mostly from the western parts of Ethiopia) from SG-I  
361 (blue; predominantly found in the eastern parts of the country), consistent with these two  
362 populations inhabiting contrasting environments, at least in terms of rainfall. Surprisingly, we  
363 also observed distinct geographic groupings between subgroups III (green) and IV (orange). SG-  
364 III is found in central Ethiopia, which is mostly characterized by cool/subhumid conditions  
365 (Amede *et al.* 2015), while SG-IV mainly from the northeastern parts of the country that is  
366 generally characterized by warm/semiarid conditions, providing additional insights into the  
367 patterns of ancestry resulting from adaptation to different agro-ecologies. In contrast, SG-II (red)  
368 is found in multiple groups along with populations from SG-I (blue), suggesting that the  
369 population structure may also be affected by other factors such as human activities including  
370 seed exchange and food preferences (Deu *et al.* 2010).

371  
372 Overall, the observation that the six distinct genetic groups identified equaled the number of  
373 different agro-ecological zones (i.e., cool/humid, cool/subhumid, cool/semiarid, warm/subhumid,  
374 warm/semiarid and warm/arid) of Ethiopian sorghum may indicate a strong contribution of agro-  
375 ecological variation to genetic groupings observed in this study. Further studies that combine  
376 population analyses with environmental and phenotypic trait variables should provide a more  
377 complete understanding of sorghum genetic structure in Ethiopia and facilitate breeding of  
378 locally adapted sorghum varieties.

### 379 **Signatures of selection**

380 We expect higher genetic population differentiation for adaptive SNP than neutral SNP if  
381 adaptation to local environments is the principal source of genetic differentiation (Villemereuil  
382 and Gaggiotti, 2015). To identify genomic regions that may be under selection pressure, we used

383 the  $F_{ST}$  outlier method (see Materials and Methods section). Of the 40 outlier SNPs identified, 31  
384 were located at less than 100 kb from annotated genes (see File S4), which provides the first  
385 support for their putative relevance.

386

387 For instance, the top  $F_{ST}$  outlier SNP (S5\_3030678;  $F_{ST} = 0.45$ ) with a signature of diversifying  
388 selection, was located at ~ 24.42 kb from Sobic.005G033801, a candidate gene which encodes  
389 flavonol 3-O-glucosyltransferase protein known to be involved in anthocyanin biosynthesis  
390 pathway (Holton and Cornish 1995). Anthocyanin accumulation appeared to be associated with  
391 grain pericarp color (Awika *et al.* 2004, 2005), and protection against bird predation (Xie *et al.*  
392 2019) in sorghum. However, the presence of pericarp color is undesirable in sorghum grains for  
393 making *injera* (a traditional pancake like bread in Ethiopia) for human consumption (Ayana and  
394 Bekel 1998). The diversifying selection observed here thus could be the result of opposing  
395 selection pressures driven by humans and natural conditions. We found two additional candidate  
396 genes (Sobic.005G041200 and Sobic.007G135301) located at 64.13 kb and 17.33 kb from  
397 S5\_3724645 and S7\_56063576 on chromosome 5 and 7, respectively. The Sobic.005G041200  
398 gene encodes F-box protein known to be associated with sorghum response to various stresses  
399 including drought (Johnson *et al.* 2014). While the Sobic.007G135301 gene encodes MADS box  
400 protein which has been associated to smut resistance in sorghum (Girma *et al.* 2019) and maize  
401 (Wang *et al.* 2012). Another candidate gene (Sobic.003G269600), for which evidence of  
402 association with sorghum phenotypic diversity for plant height had been reported (Phuong *et al.*  
403 2013), was identified near S3\_60642776. In Ethiopia, sorghum grows in diverse agro-ecologies  
404 ranging from the hot and dry lowlands to high-altitude regions (Snowden 1936), where different  
405 environmental conditions favor different biotic and abiotic stress factors. Thus, the diversifying

406 selections detected in this study are expected, as the type of selection acting on a gene can be  
407 different between populations depending on the environments.

## 408 **CONCLUSION**

409 This study reported a high level of genetic diversity and differentiation among Ethiopian  
410 sorghum accessions, which provides a great opportunity for developing new cultivars with  
411 desirable characteristics. Our results illustrate how populations adapting to different  
412 environments become structured genetically on small spatial scales. We found genomic regions  
413 of potential interest, with further large-scale phenotypic and geographic characterization can  
414 provide multiple lines of evidence for the putative importance of these particular loci in the  
415 genetic control of traits of economic and adaptive importance in sorghum. Overall, this study  
416 contributes to the genomic resources available for sorghum improvement efforts around the  
417 world.

## 418 **ACKNOWLEDGEMENTS**

419 We are grateful to the USAID's Feed the Future Laboratory for Climate Resilient Sorghum for  
420 providing financial support to undertake this study. We also thank the staff of Genomics and  
421 Bioinformatics Core Facility at the University of Georgia for their support in GBS and  
422 bioinformatics services.

## 423 **LITERATURE CITED**

424 Adugna, A., 2014 Analysis of in situ diversity and population structure in Ethiopian cultivated  
425 Sorghum landraces using phenotypic traits and SSR markers. SpringerPlus 3: 1-14, doi:  
426 10.1186/2193-1801-3-212.  
427 Alexander, D. H., J. Novembre, and K. Lange, 2009 Fast model-based estimation of ancestry in  
428 unrelated individuals. Genome Research, [doi.org/10.1101/gr.094052.109](https://doi.org/10.1101/gr.094052.109).

- 429 Amede T, Auricht C, Boffa J, Dixon J, Mallawaarachchi T, Rukuni M, Teklewold DT. 2015.  
430 The evolving farming and pastoral landscapes in Ethiopia: a farming system framework  
431 for investment planning and priority setting. ACIAR, Canberr
- 432 Awika, J. M., L. W. Rooney, and R. D. Waniska, 2004 Properties of 3-deoxyanthocyanins from  
433 sorghum. *Journal of Agriculture and Food Chemistry* 52: 4388-4394.
- 434 Awika, J. M., L. W. Rooney, and R. D. Waniska, 2005 Anthocyanins from black sorghum and  
435 their antioxidant properties. *Food Chemistry* 90: 293-301.
- 436 Ayana, A., and E. Bekele, 1998 Geographical patterns of morphological variation in Sorghum  
437 germplasm from Ethiopia and Eritrea: qualitative characters. *Hereditas* 129: 195–205.
- 438 Ayana, A., and E. Bekele, 1999 Multivariate analysis of morphological variation in sorghum  
439 germplasm from Ethiopia and Eritrea. *Genetic Resources and Crop Evolution* 46: 273-  
440 284.
- 441 Ayana, A., and E. Bekele, 2000a Geographical patterns of morphological variation in sorghum  
442 germplasm from Ethiopia and Eritrea: Quantitative characters. *Euphytica* 115: 91-104.
- 443 Ayana, A., T. Bryngelsson, and E. Bekele, 2000b Genetic variation of Ethiopian and Eritrean  
444 sorghum germplasm assessed by random amplified polymorphic DNA (RAPD). *Genetic*  
445 *Resources and Crop Evolution* 47: 471-482.
- 446 Balota, M., W. A. Payne, W. L. Rooney, and D. T. Rosenow, 2008 Gas exchange and  
447 transpiration ratio in sorghum. *Crop Science* 48: 2361-2371, doi:  
448 [org/10.2131/cropsci.01.0051](https://doi.org/10.2131/cropsci.01.0051).
- 449 Barnaud, A., Deu, M., Garine, E., McKey, D., and Joly, H.I. 2007. Local genetic diversity of  
450 sorghum in a village in northern Cameroon: structure and dynamics of landraces. *Theor.*  
451 *Appl. Genet.* **114**(2): 237–248. doi:10.1007/s00122-006-0426-8. PMID:17089177.

- 452 Bouchet, S., D. Pot, M. Deu, JF. Rami, C. Billot *et al.*, 2012 Genetic structure, linkage  
453 disequilibrium and signature of selection in sorghum: Lessons from physically anchored  
454 DArT markers. PLoS One 7(3), doi:10.1371/journal.pone.0033470.
- 455 Bradbury, P. J., Z. Zhang, D. E. Kroon, T. M. Casstevens, Y. Ramdoss, and E. S. Buckler, 2007  
456 TASSEL: Software for association mapping of complex traits in diverse samples.  
457 Bioinformatics, doi.org/10.1093/bioinformatics/btm308.
- 458 Browning, S. R., and B. L. Browning, 2007 Rapid and accurate haplotype phasing and missing-  
459 data inference for whole-genome association studies by use of localized haplotype  
460 clustering. The American Journal of Human Genetics, 81(5), 1084-1097.  
461 <https://doi.org/10.1086/521987>.
- 462 Campbell, B. C., E. K. Gilding, E. S. Mace, S. Tai, Y. Tao, P. J. Prentis, P. Thomelin, D. R.  
463 Jordan, and I. D. Godwin, 2016 Domestication and the storage starch biosynthesis pathway:  
464 signatures of selection from a whole sorghum genome sequencing strategy. Plant  
465 Biotechnology Journal, doi:10.1111/pbi.12578.
- 466 Casa, A. M., S. E. Mitchell, M. T. Hamblin, H. Sun, J. E. Bowers and S. Kresovich, 2005  
467 Diversity and selection in sorghum: simultaneous analyses using simple sequence repeats.  
468 Theoretical Applied Genetics 111: 23-30.
- 469 Caye K, T., Deist H., Martins O., Michel and O. François, 2016 TESS3: fast inference of spatial  
470 population structure and genome scans for selection. Mol Ecol Resour 16(2):540–548.  
471 <https://doi.org/10.1111/1755-0998.12471>
- 472 Central Statistical Agency, 2018 Agricultural sample survey report on area and production of  
473 major crops (private peasant holdings, Meher season), Statistical Bulletin, Vol I,  
474 September-December. , Addis Ababa, Ethiopia.

- 475 Cuevas, H. E., and L. K. Prom, 2013 Assessment of molecular diversity and population structure  
476 of the Ethiopian sorghum germplasm collection maintained by the USDA-ARS National  
477 Plant Germplasm Systems using SSR markers. *Genetic Resources and Crop Evolution*  
478 60: 1817-30.
- 479 Cuevas, H. E., G. R. Valentin, C. M. Hayes, W. L. Rooney, and L. Hoffman, 2017 Genomic  
480 characterization of a core set of the USDA-NPGS Ethiopian sorghum germplasm  
481 collection: implications for germplasm conservation, evaluation, and utilization in crop  
482 improvement. *BMC Genomics* 18:108, doi: 10.1186/s12864-016-3475-7.
- 483 Cuevas, H. E., L. K. Prom, E. A. Cooper, J. E. Knoll, and X. Ni, 2018 Genome-Wide  
484 Association Mapping of Anthracnose (*Colletotrichum sublineolum*) Resistance in the  
485 U.S. Sorghum Association Panel. *The Plant Genome* 11.
- 486 Cuevas, H. E., and L. K. Prom, 2020 Evaluation of genetic diversity, agronomic traits, and  
487 anthracnose resistance in the NPGS Sudan sorghum core collection. *BMC Genomics*  
488 21:88, doi: org/10.1186/s12864-020-6489-0.
- 489 Dahlberg, J. A., and K. Wasylikowa, 1996 Image and statistical analyses of early sorghum  
490 remains (8000 B.P.) from the Nabata Playa archaeological site in the Western Desert,  
491 southern Egypt. *Vegetation History and Archaeobotany* 5: 293-299.
- 492 Deschamps, S., V. Llaca, and G. D. May, 2012 Genotyping-by-sequencing in plants. *Biology* 1:  
493 460–483, doi: 10.3390/biology1030460.
- 494 Desmae, H., 2007 Genetic diversity and variability in grain quality of sorghum landraces from  
495 North-Eastern Ethiopia. PhD thesis, University of Queensland.

- 496 Desmae, H., D. Jordan, and I. Godwin, 2016a DNA markers reveal genetic structure and  
497 localized diversity of Ethiopian sorghum landraces. *African Journal of Biotechnology*  
498 15: 2301-2311, doi: 10.5897/AJB2016.1540.
- 499 Desmae, H., D. Jordan, and I. Godwin, 2016b Geographic patterns of phenotypic diversity in  
500 sorghum landraces from North Eastern Ethiopia. *African Journal of Agricultural*  
501 *Research* 11: 3111-3122.
- 502 Deu, M., Sagnard, F., Chantereau, J., Calatayud, C., Vigouroux, Y., Pham, J.L., et al. 2010.  
503 Spatio-temporal dynamics of genetic diversity in *Sorghum bicolor* in Niger. *Theor. Appl.*  
504 *Genet.* **120**(7): 1301–1313. doi:10.1007/s00122-009-1257-1.
- 505 Dje, Y., M. Heuertz, M. Ater, C. Lefebvre, and X. Vekemans, 2004 In situ estimation of  
506 outcrossing rate in sorghum landraces using microsatellite markers. *Euphytica* 138: 205-  
507 12.
- 508 Doggett, H., 1988 *Sorghum*, 2nd ed. Longman.
- 509 Elshire, R. J., J. C. Glaubitz, Q. Sun, J. A. Poland, K. Kawamoto *et al.*, 2011 A robust, simple  
510 genotyping-by-sequencing (GBS) approach for high diversity species. *PLoSOne* 6: 1-10,  
511 <https://doi.org/10.1371/journal.pone.0019379>.
- 512 Excoffier, L., P. E. Smouse, and J. M. Quattro, 1992 Analysis of molecular variance inferred  
513 from metric distances among DNA haplotypes: application to human mitochondrial DNA  
514 restriction data. *Genetics* 131: 479-491.
- 515 Faye, J. M., F. Maina, Z. Hu, D. Fonckea, N. Cisse, and G. P. Morris, 2019 Genomic signatures  
516 of adaptation to Sahelian and Soudanian climates in sorghum landraces of Senegal.  
517 *Ecology and Evolution* 9: 6038-6051, doi: 10.1002/ece3.5187.



- 518 Frere, C. H., P. J. Prentis, E. K. Gilding, A. M. Mudge, A. Cruickshank *et al.*, 2011 Lack of low  
519 frequency variants masks patterns of non-neutral evolution following domestication.  
520 PLoSOne 6.
- 521 Foll, M., and O. Gaggiotti, 2008 A genome-scan method to identify selected loci appropriate for  
522 both dominant and co-dominant markers: a Bayesian perspective. *Genetics* 80: 977–93.
- 523 Gau, B., Yang G., Takuno S, and Luis E. 2011. The Patterns and Causes of Variation in Plant  
524 Nucleotide Substitution Rates. *Annu. Rev. Ecol. Evol. Syst.* 42:245–66
- 525 Gebeyehu, G., 1993 Characterization and evaluation of sorghum germplasms collected from  
526 Gambella. MSc Thesis. Alemaya University of Agriculture, Ethiopia.
- 527 Geleta, M., M. T. Labuschagne, and C. D. Viljoen, 2006 Genetic diversity analysis in sorghum  
528 germplasm as estimated by AFLP, SSR and morpho-agronomical markers. *Biodiversity*  
529 *and Conservation* 15: 3251–3265.
- 530 Girma G, H. Nida, A. Seyoum, M. Mekonen, A. Nega, D. Lule, K. Dessalegn *et al.*, 2019 A  
531 large-scale genome-wide association analyses of Ethiopian sorghum landrace collection  
532 reveal loci associated with important traits. *Frontier in Plant Sciences* 10: 691, doi:  
533 10.3389/fpls.2019.00691.
- 534 Goudet, J., 2005 HIERFSTAT, a package for R to compute and test hierarchical F-statistics.  
535 *Molecular Ecology Notes* 5: 184-6.
- 536 Gruber and Adamack, 2014 Introduction to PopGenReport using PopGenReport Ver. 2.0.
- 537 Hamblin, M. T. and S. E. Mitchell, G. M. White, J. Gallego, R. Kukatla *et al.*, 2004 Comparative  
538 population genetics of the panicoid grasses: sequence polymorphism, linkage  
539 disequilibrium and selection in a diverse sample of *Sorghum bicolor*. *Genetics* 167: 471-  
540 483.

- 541 Harlan, J. R., and J. M. J. de Wet, 1972 A simplified classification of cultivated sorghum. *Crop*  
542 *Science* 12: 172-176.
- 543 Holton, T. A., and E. C. Cornish, 1995 Genetics and biochemistry of anthocyanin biosynthesis.  
544 *Plant Cell* 7: 1071-1083, doi: 10.1105/tpc.7.7.1071.
- 545 Hulbert, S. H., 1971 The non-concept of species diversity: a critique and alternative parameters.  
546 *Ecology* 52: 577-586.
- 547 Hu, Z, B. Mbacké, R. Perumal, M. C. Guèye, O. Sy *et al.*, 2015 Population genomics of pearl  
548 millet Comparative analysis of global accessions and Senegalese landraces. *BMC*  
549 *Genomics* 16: 1048, doi:10.1186/s12864-015-2255-0.
- 550 Huang, X., X. We, T. Sang, Q. Zhao, Q. Feng, Y. Zhao, C. Li *et al.*, 2010 Genome-wide  
551 association studies of 14 agronomic traits in rice landraces. *Nature Genetics* 42: 961-967,  
552 doi:10.1038/ng.695.
- 553 Johnson, S. M., FL. Lim, A. Finkler, H. Fromm, A. R. Slabas and MR, Knight, 2014  
554 Transcriptomic analysis of *Sorghum bicolor* responding to combined heat and drought  
555 stress. *BMC Genomics* 15: 456, doi:10.1186/1471-2164-15-456.
- 556 Mace, E. S., K. K. Buhariwalla, H. K. Buhariwalla, and J. H. Crouch, 2003 A high-throughput  
557 DNA extraction protocol for tropical molecular breeding programs. *Plant Molecular*  
558 *Biology* 21: 459-460, doi: 10.1007/BF02772596.
- 559 Mace, E. S., S. Tai, E. K. Gilding, Y. Li, P. J. Prentis, L. Bian, B. C. Campbell *et al.*, 2013  
560 Whole-genome sequencing reveals untapped genetic potential in Africa's indigenous  
561 cereal crop sorghum. *Nature Communications* 4: 2320, doi: 10.1038/ncomms3320.

- 562 Maina, F., S. Bouchet, S. R. Marla, Z. Hu, J. Wang, and A. Mamadou, M. Abdou *et al.*, 2018.  
563 Population genomics of sorghum across diverse agro-climatic zones of Niger. *Genome*  
564 61: 223-232; doi.org/10.1139/gen-2017-0131.
- 565 Menamo, T., B. Kassahun, A. K. Borrell, D. R. Jordan, Y. Tao, C. Hunt and E. Mace. 2020  
566 Genetic diversity of Ethiopian sorghum reveals signatures of climatic adaptation.  
567 *Theoretical and Applied Genetics*, <https://doi.org/10.1007/s00122-020-03727-5>
- 568 Memon, S., Jia X., Gu and X. Zhang. 2016 Genomic variations and distinct evolutionary rate of  
569 rare alleles in *Arabidopsis thaliana*. *BMC Evolutionary Biology* 16:25. doi  
570 10.1186/s12862-016-0590-7
- 571 Miaoulis, George, and R. D. Michener, 1976 *An Introduction to Sampling*. Dubuque, Iowa:  
572 Kendall/Hunt Publishing Company.
- 573 Morris, G. P., P. Ramu, S. P. Deshpande, C. T. Hash, T. Shah, H. D. Upadhyaya, O. Riera-  
574 Lizarazu *et al.*, 2013 Population genomic and genome-wide association studies of agro-  
575 climatic traits in sorghum. *Proc. Natl. Acad. Sci. USA* 110: 453-458,  
576 doi.org/10.1073/pnas.1215985110.
- 577 Olatoye, M. O., Z. Hu, F. Maina, and G. P. Morris, 2018 Genomic Signatures of Adaptation to a  
578 Precipitation Gradient in Nigerian Sorghum. *G3* 8: 3269-3281, doi:  
579 <https://doi.org/10.1534/g3.118.200551>.
- 580 Paterson, A. H., J. E. Bowers, R. Bruggmann, I. Dubchak, J. Grimwood, H. Gundlach, G.  
581 Haberer *et al.*, 2009 The Sorghum bicolor genome and the diversification of grasses.  
582 *Nature* 457: 551-556.
- 583 Perrier and Jacquemoud-Collet, 2006 DARwin software <http://darwin.cirad.fr/darwin>.

- 584   Phuong, N., Stützel, H., and R. Uptmoor, 2013 Quantitative trait loci associated to agronomic  
585       traits and yield components in a *Sorghum bicolor* L. Moench RIL population cultivated  
586       under pre-flowering drought and well-watered conditions. *Agricultural Sciences*.  
587       04(12):781–791. doi:10.4236/as.2013.412107.
- 588   Poland, J. A., and T. W. Rife, 2012 Genotyping-by-sequencing for plant breeding and genetics.  
589       *Plant Genome* 5: 92-102, doi: 10.3835/plantgenome2012.05.0005.
- 590   R Core Team, 2019 R: A language and environment for statistical computing. Vienna: R Core  
591       Team.
- 592   Reddy, B. V. S., S. Ramesh, P. S. Reddy, and A. A. Kumar, 2009 Genetic enhancement for  
593       drought tolerance in sorghum. *Plant Breeding Review* 31: 189-222.
- 594   Schertz, K. F., 1977 Registration of A2Tx2753 and BTx2753 sorghum germplasm. *Crop Science*  
595       17: 983.
- 596   Singh, R., and J. D. Axtell, 1973 High lysine mutant gene (hl) that improves protein quality and  
597       biological value of grain sorghum. *Crop Science* 13: 535.
- 598   Siol, M., Wright, SI., Barrett, SCH. 2010. The population genomics of plant adaptation. *New*  
599       *Phytologist*. 188(2):313–332. doi:10.1111/j.1469-8137.2010.03401.x.
- 600   Snowden, J. D., 1936 *The cultivated races of Sorghum*. Adlard and Son, London.
- 601   Sokal, R. R., and C. D. Michener, 1958 A statistical method for evaluating system relationship.  
602       University of Kansas, *Science Bulletin*, pp 1409-1430.
- 603   Stemler, A. B. L., J. R. Harlan, and J. M. J. de Wet, 1977 The sorghums of Ethiopia. *Economic*  
604       *Botany* 31: 446-460.
- 605   Tao, Y., E. S. Mace, S. Tai, A. Cruickshank, B. C. Campbell *et al.*, 2017 Whole-genome analysis  
606       of candidate genes associated with seed size and weight in sorghum bicolor reveals

- 607 signatures of artificial selection and insights into parallel domestication in cereal crops.  
608 *Frontier in Plant Sciences* 8: 1237, doi: 10.3389/fpls.2017.01237.
- 609 Teshome, A., B. R. Baum, L. Fahrig, J. K. Torrance, T. J. Arnason, and J. D. Lambert, 1997  
610 *Sorghum* landraces variation and classification in north Shewa and south Welo, Ethiopia.  
611 *Euphytica* 97: 255-263.
- 612 Tesso, T., I. Kapran, C. Grenier, A. Snow, P. Sweeney *et al.*, 2008 The potential for crop to-wild  
613 gene flow in sorghum in Ethiopia and Niger: a geographic survey. *Crop Science* 48:  
614 1425-1431.
- 615 Vavilov, N. I., 1951 The origin, variation, immunity and breeding of cultivated plants.  
616 *Chronologies Botany* 13: 1-3.
- 617 Villemereuil, P., Gaggiotti, O. 2015. A new  $F_{ST}$ -based method to uncover local adaptation using  
618 environmental variables. *Methods in Ecology and Evolution*, 6, 1248–1258. doi:  
619 10.1111/2041-210X.12418
- 620 Weerasooriya, D. K., F. R. Maulana, A. Y. Bandara, A. Tirfessa, G. Mengistu *et al.*, 2016  
621 Genetic diversity and population structure among sorghum germplasm collections from  
622 Western Ethiopia. *African Journal of Biotechnology* 15: 1147-1158.
- 623 Weir, B. S., and C. C. Cockerha, 1984 Estimating F-statistics for the analysis of population-  
624 structure. *Evolution* 38: 1358-1370.
- 625 Wondimu, Z., K. Bantte, A. H. Paterson, and W. Worku, 2020 Agro-morphological diversity of  
626 Ethiopian sorghum [*Sorghum bicolor* (L.) Moench] landraces under water limited  
627 environments. *Genetic Resources and Crop Evolution*, doi: org/10.1007/s10722-020-  
628 00968-7.
- 629 Wright, S., 1965 The interpretation of population structure by F-statistics with special regard to  
630 system of mating. *Evolution* 19, 395-420.

631 Zhang, D., W. Kong, J. Robertson, V. H. Goff, E. Epps *et al.*, 2015 Genetic analysis of  
632 inflorescence and plant height components in sorghum (Panicoidae) and comparative  
633 genetics with rice (Oryzoidae). *BMC Plant Biology* 15:107, doi: 10.1186/s12870-015-  
634 0477-6.

635

636

637

638

639

640

641

642

643

644

645

646

647

648

649

650

651

652

653

654

655

656

657 **Table 1 Percentage of transition and transversion SNPs identified using genotyping-by-sequencing**

|                      | Transition    |        | Transversion  |       |        |       |
|----------------------|---------------|--------|---------------|-------|--------|-------|
|                      | A/G           | C/T    | A/C           | A/T   | G/C    | G/T   |
| No. of allelic sites | 34,166        | 33,931 | 9,321         | 7,879 | 13,310 | 9,500 |
| % of allelic sites   | 31.60         | 31.40  | 8.60          | 7.30  | 12.31  | 8.78  |
| <b>Total</b>         | <b>68,097</b> |        | <b>40,010</b> |       |        |       |
| <b>Percentage</b>    | <b>63.00</b>  |        | <b>37.00</b>  |       |        |       |

658

659

660 **Table 2 Genetic diversity estimates of Ethiopian sorghum accessions at different population levels**

| Population                    | N <sup>a</sup> | n  | N <sub>E</sub> | R <sub>S</sub> | N <sub>PA</sub> | H <sub>o</sub> | H <sub>e</sub> | PIC  |
|-------------------------------|----------------|----|----------------|----------------|-----------------|----------------|----------------|------|
| Entire panel                  | 304            | -  | 1.46           | -              | -               | 0.12           | 0.29           | 0.24 |
| <b>Administrative regions</b> |                |    |                |                |                 |                |                |      |
| Amhara                        | 146            | 30 | 1.47           | 1.79           | 776             | 0.13           | 0.30           | 0.24 |
| Oromia                        | 77             | 30 | 1.42           | 1.77           | 230             | 0.11           | 0.28           | 0.24 |
| Tigray                        | 44             | 30 | 1.53           | 1.78           | 126             | 0.19           | 0.32           | 0.26 |
| Southern Nations              | 37             | 30 | 1.48           | 1.81           | 55              | 0.12           | 0.30           | 0.24 |
| <b>ADMIXTURE subgroups</b>    |                |    |                |                |                 |                |                |      |
| SG-I <sup>b</sup>             | 84             | 25 | 1.51           | 1.60           | 683             | 0.19           | 0.30           | 0.26 |
| SG-II                         | 41             | 25 | 1.50           | 1.50           | 500             | 0.18           | 0.29           | 0.25 |
| SG-III                        | 33             | 25 | 1.32           | 1.33           | 12              | 0.01           | 0.23           | 0.20 |
| SG-IV                         | 80             | 25 | 1.51           | 1.64           | 648             | 0.19           | 0.30           | 0.26 |
| SG-V                          | 37             | 25 | 1.52           | 1.77           | 637             | 0.15           | 0.32           | 0.26 |
| SG-VI                         | 29             | 25 | 1.50           | 1.66           | 1430            | 0.15           | 0.31           | 0.25 |

661

662 <sup>a</sup>N: Number of individuals; n: Subsample size; N<sub>E</sub>: Effective number of alleles; R<sub>S</sub>: Allelic richness,

663 N<sub>PA</sub>: Number of private alleles, H<sub>o</sub>: Observed heterozygosity, H<sub>e</sub>: Expected heterozygosity, PIC:

664 Polymorphism information content and F<sub>IS</sub>: Inbreeding coefficient; <sup>b</sup> SG-I to SG-VI represents subgroup 1

665 to 6. Except for the entire panel, basic diversity statistics (N<sub>E</sub>; H<sub>o</sub>; H<sub>e</sub> and PIC) were estimated based on

666 subsamples of equal size.

667

668

669

670

671

672 **Table 3 Pair wise  $F_{ST}$  matrix, a measure of population divergence among the six ADMIXTURE subgroups**

|        | SG-II <sup>a</sup> | SG-III | SG-IV | SG-V | SG-VI |
|--------|--------------------|--------|-------|------|-------|
| SG-I   | 0.44               | 0.18   | 0.11  | 0.25 | 0.31  |
| SG-II  |                    | 0.48   | 0.41  | 0.21 | 0.23  |
| SG-III |                    |        | 0.16  | 0.27 | 0.38  |
| SG-IV  |                    |        |       | 0.21 | 0.29  |
| SG-V   |                    |        |       |      | 0.23  |

673

674 <sup>a</sup> SG-I to SG-VI represents subgroup 1 to 6

675

676

677

678

679

680

681

682

683

684

685

686

687

688

689

690

691

692

693

694

695

696

697

698

699

700

701



702 **Figure 1** Distribution of Ethiopian sorghum accessions. (A) Geographic distribution of geo-referenced  
703 Ethiopian sorghum accessions. (B) The elevation from where each sorghum accession originated.  
704 Accessions are colored by adaptation zones (Lowland = Red; Intermediate = Blue; Highland = Orange).

705

706 **Figure 2** Population structure analysis of 304 Ethiopian sorghum accessions using 108,107 SNPs. (A)  
707 The cross-validation error (Y-axis) for K values from 1 to 20 (X-axis) decreased steeply until it reached 6  
708 (arrow), suggesting an optimal number of subgroups at K = 6. (B) Bar-plot describing the population  
709 structure estimated from ADMIXTURE analysis at K = 6. Color-coding of Q-value bar plots is arbitrary.  
710 SG-I to SG-VI represents subgroup 1 to 6.

711

712 **Figure 3** Genetic clustering of Ethiopia sorghum collection based on 108,107 SNPs. (A) Neighboring-  
713 Joining (NJ) tree of 304 sorghum accessions from DARwin 6.0.14, (B) Spatial interpolation of  
714 population ancestry coefficients across the geographic distribution of the accessions. Subgroups  
715 are color-coded based on predominant ancestry groups determined in ADMIXTURE.

716

717 **Figure 4** Minor allele frequency (MAF) and number of SNPs based on 304 sorghum accessions from  
718 Ethiopia.

719

720 **Figure 5** BAYESCAN results for the analysis of 79,754 SNPs among six Ethiopian sorghum subgroups for  
721 outlier prediction. (A) The distribution of  $F_{ST}$  values across the sorghum genome. The red horizontal line is  
722 a cut-off for top  $F_{ST}$  outlier SNPs. (B) Each  $F_{ST}$  value is plotted against the log10 of the corresponding q-  
723 value for outlier prediction. The vertical line indicates the threshold false discovery rate (FDR = 0.05)  
724 value used to identify outlier SNPs represented on the right side of the line.

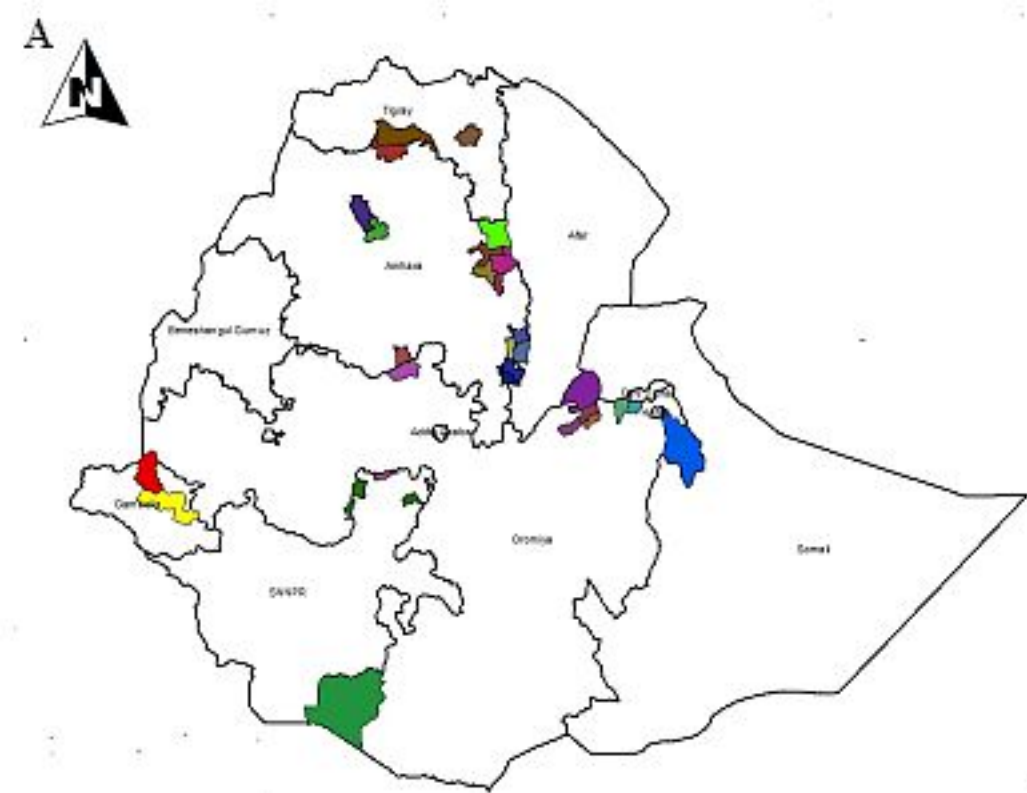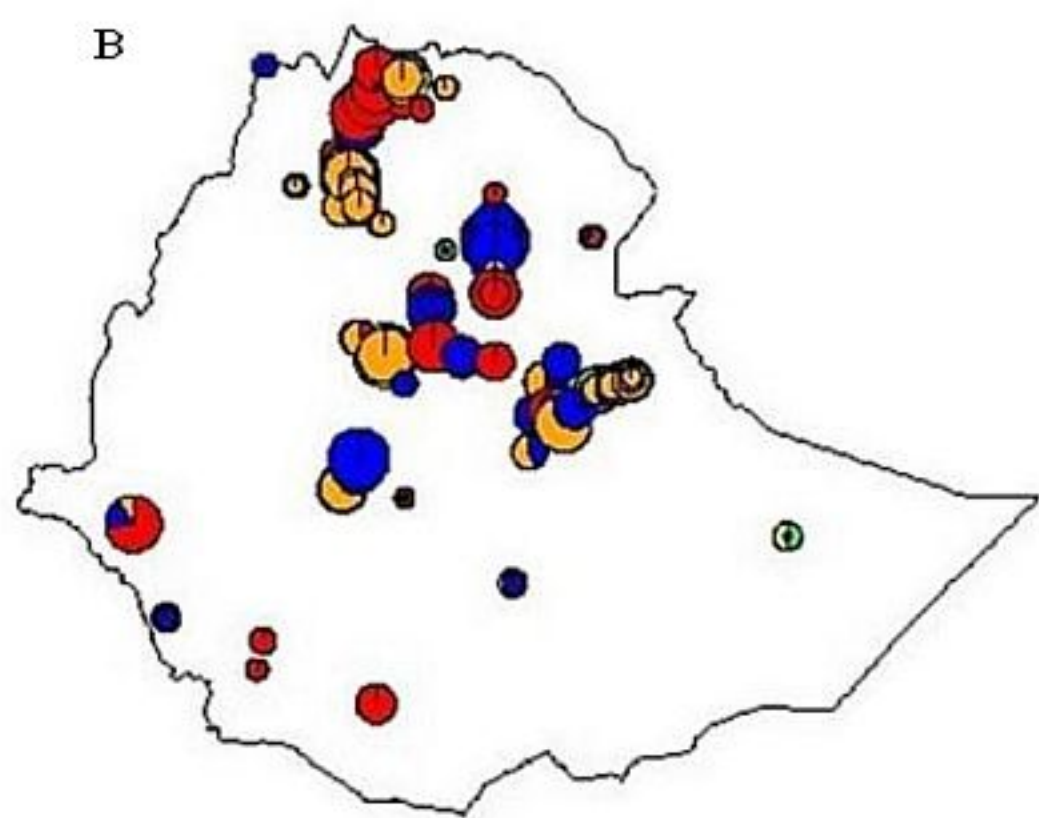

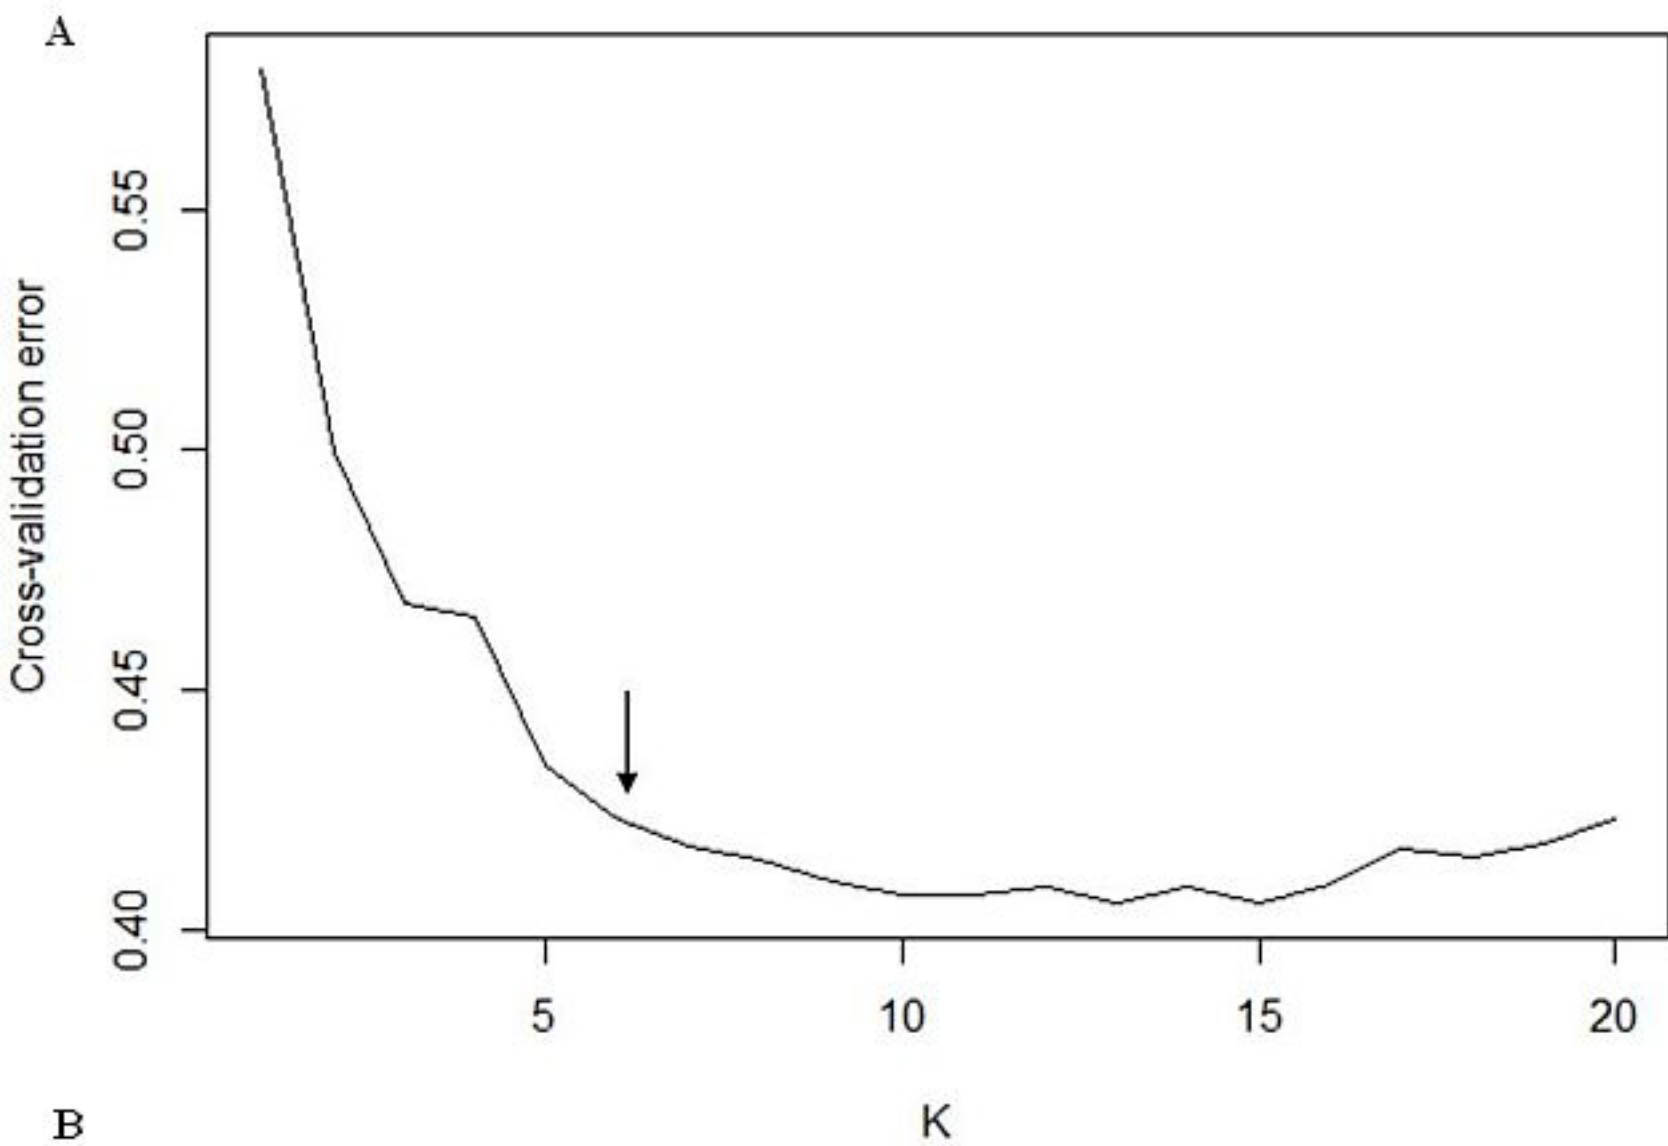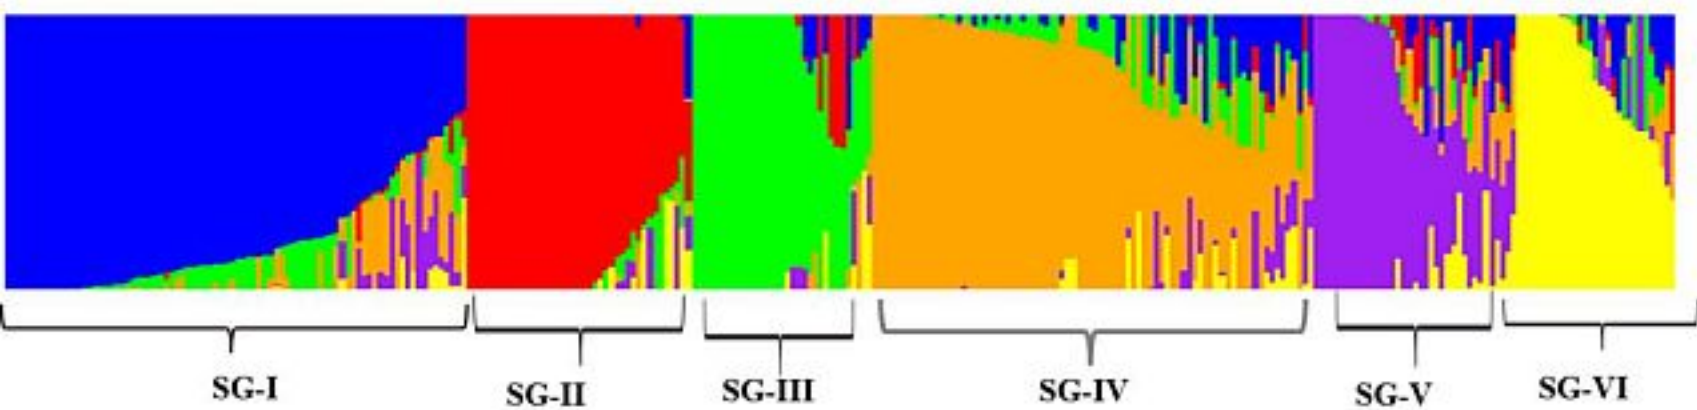

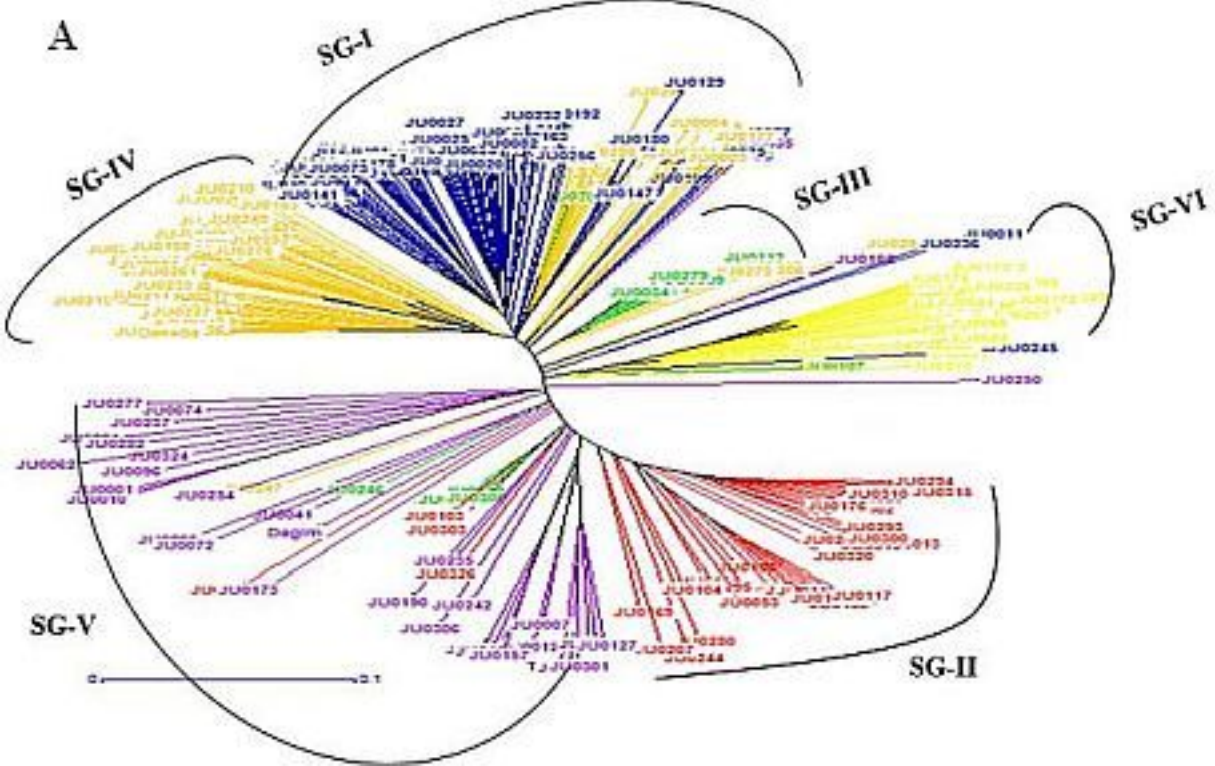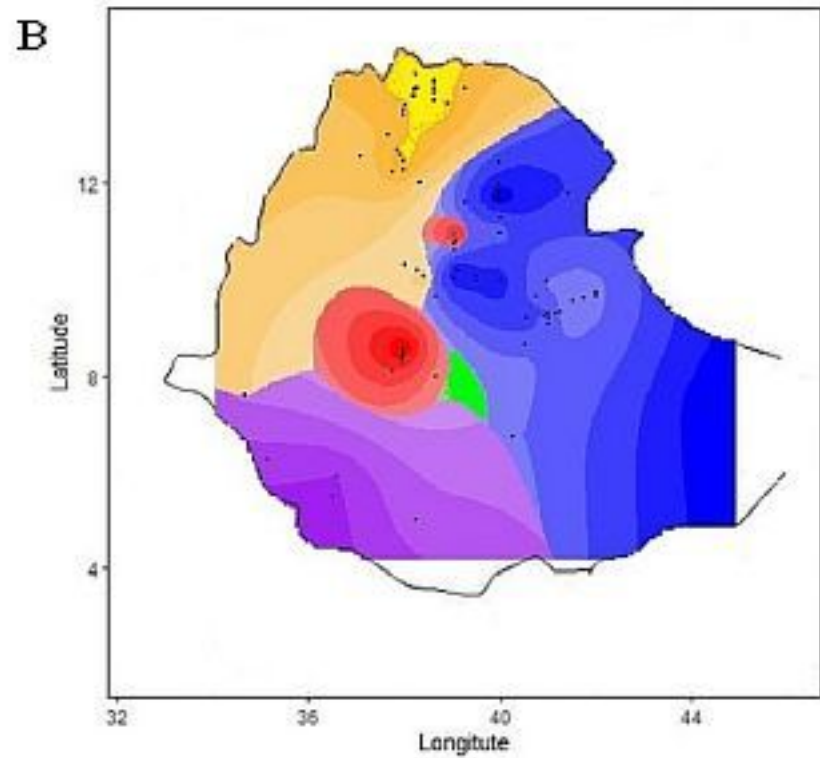

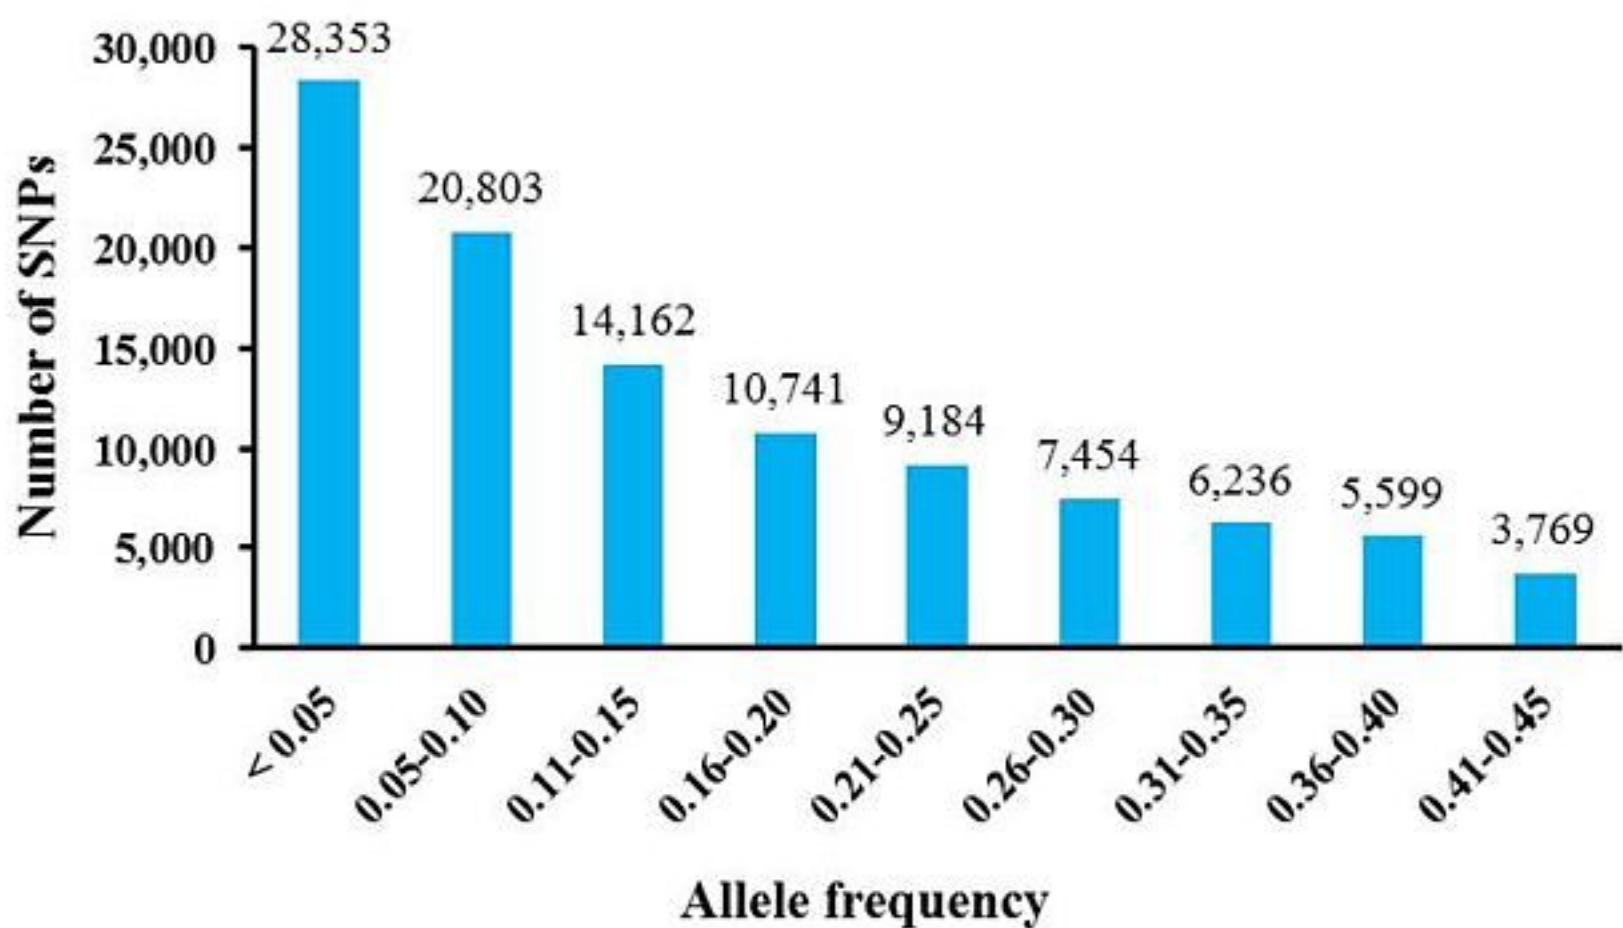

A

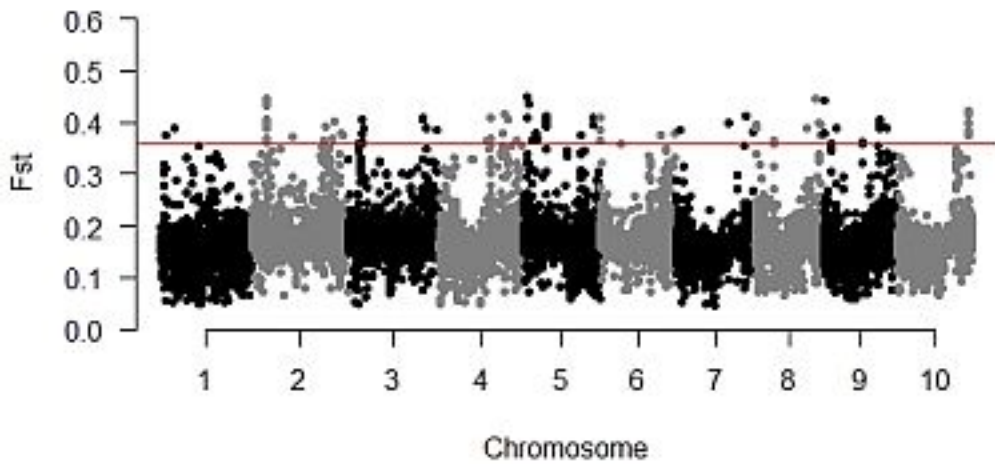

B

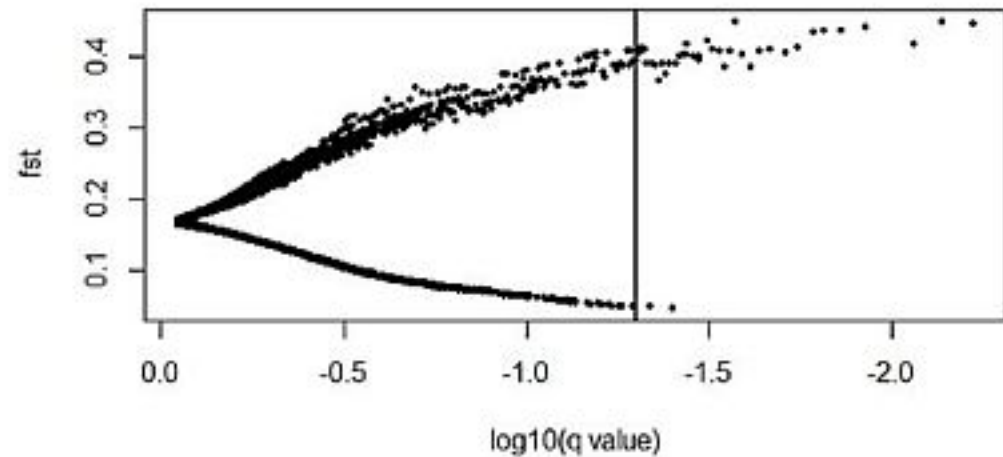

Source: https://www.biorxiv.org/content/biorxiv/early/2021/01/20/2021.01.19.427274.full.pdf
